# Supplementary material for: The effect of electrolyte with binary solvents on improving the performance of rechargeable lithium–oxygen batteries
Source: Royal Society of Chemistry journal article supplement (doi:10.1039/d3se01531a), 2024-01-01
Supplement: d3se01531a1.pdf [file d3se01531a1.pdf]

## Electronic Supplementary Information (ESI)

# The effect of electrolyte with binary solvents to improve the cycling performance of rechargeable lithium-oxygen batteries

Tie Liu,<sup>a,\*</sup> Wenjing Li,<sup>a</sup> Guangwei Zhang<sup>a</sup> and Aishui Yu<sup>b</sup>

<sup>a</sup> School of Chemistry and Chemical Engineering, Heze University, Heze 274015, China. E-mail: lime1032@163.com

<sup>b</sup> Department of Chemistry, Collaborative Innovation Center of Chemistry for Energy Materials, Shanghai Key Laboratory of Molecular Catalysis and Innovative Materials, Institute of New Energy, Fudan University, Shanghai 200438, China.

## The pre-treatment process of MCNTs

At first, 50 mg carbon nanotubes were prepared and dispersed in a mixed solution (60 mL) of nitric acid (60 wt %) and sulfuric acid (98 wt %) with a volume ratio of 1:3 at 80 °C for 8 h. Then, the acidified carbon nanotubes were cleaned with deionized water until the filtrate was neutral. After vacuum drying at 80 °C for overnight, it was subsequently calcined at 800 °C for 2 h in Ar protective atmospheres at a ramp rate of 5°C min<sup>-1</sup> to obtain the MCNTs sample.

**Table. S1** Physical properties of common solvents in LOBs

| Solvents | DN/AN     | Boiling point/ °C | Density/ (g cm <sup>-3</sup> ) |
|----------|-----------|-------------------|--------------------------------|
| G3       | none      | 216               | 0.986                          |
| G4       | 16.6/11.7 | 276               | 1.009                          |
| DMSO     | 29.8/19.3 | 189               | 1.100                          |
| DMC      | 23.9/10.2 | 90                | 1.069                          |

Notes: DN, Donor number; AN, Acceptor number

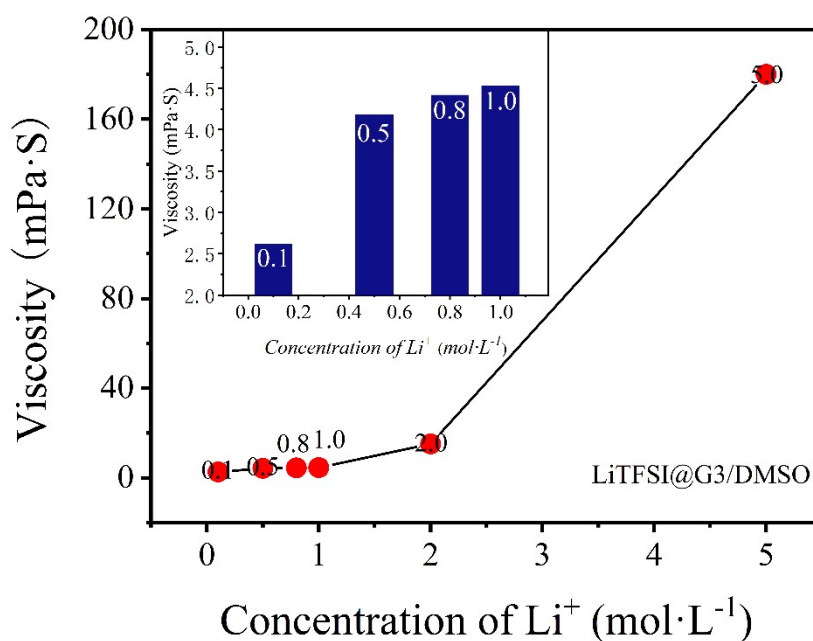

**Fig. S1** The viscosity values of the G3/DMSO based electrolyte with different salt concentrations.

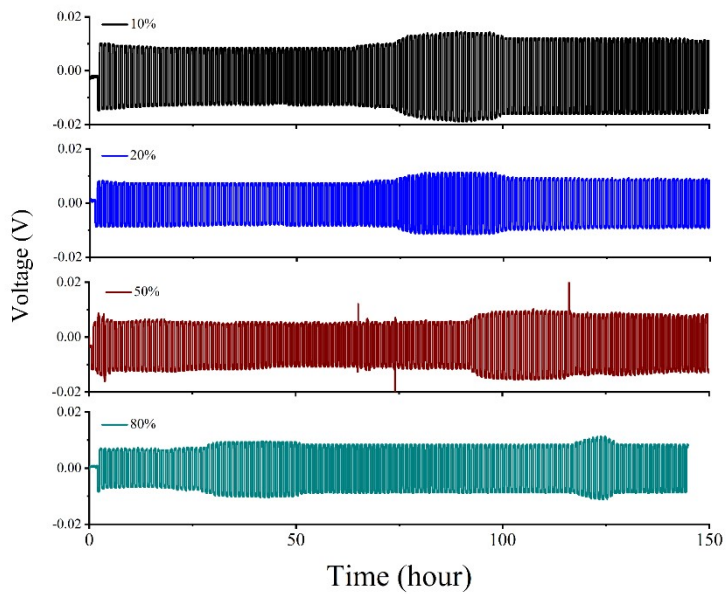

**Fig. S2** The voltage profiles of Li plating/stripping cycling using G3/DMSO based electrolytes with different volume ratio under  $0.1 \text{ mA cm}^{-2}$ .

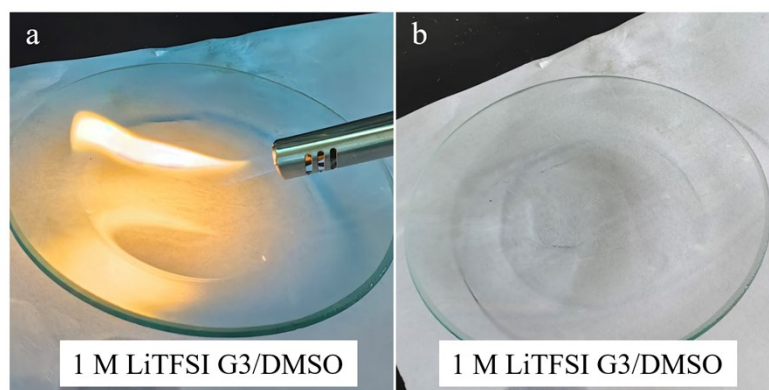

**Fig. S3** Flammability test of the 1 M LiTFSI G3/DMSO electrolyte using a butane flame: (a) ignition for 20 s and (b) after ignition.

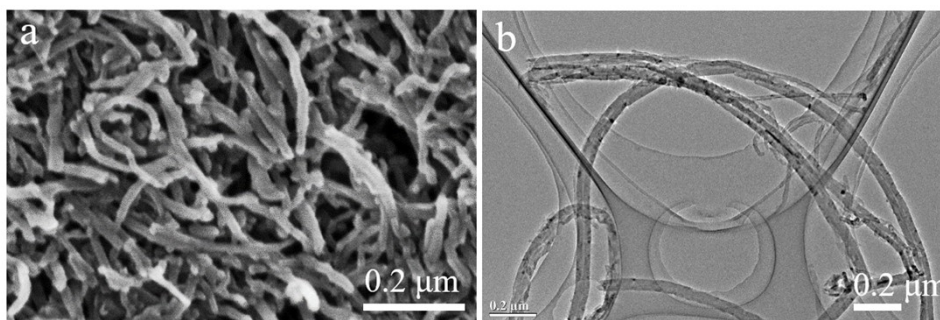

**Fig. S4** (a) SEM image and (b) low TEM image of post-treatment MCNT, respectively.

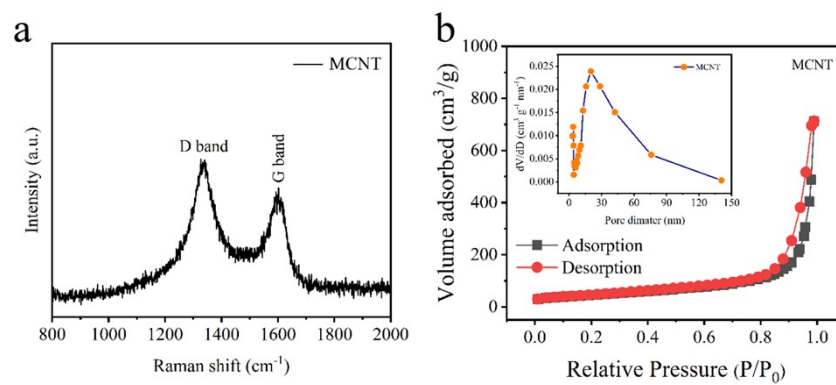

**Fig. S5** (a) Raman spectrum and (b) N<sub>2</sub> adsorption–desorption isotherms and pore-size distribution of post-treatment MCNT, respectively.

**Table. S2** Theoretical electromotive force and theoretical energy density of post-treatment MCNT

| Sample | Surface Area/<br>(m <sup>2</sup> g <sup>-1</sup> ) | Total pore volume/<br>(cm <sup>3</sup> g <sup>-1</sup> ) | Average pore Diameter/<br>(nm) |
|--------|----------------------------------------------------|----------------------------------------------------------|--------------------------------|
| MWCNT  | 160.504                                            | 1.102                                                    | 27.47                          |

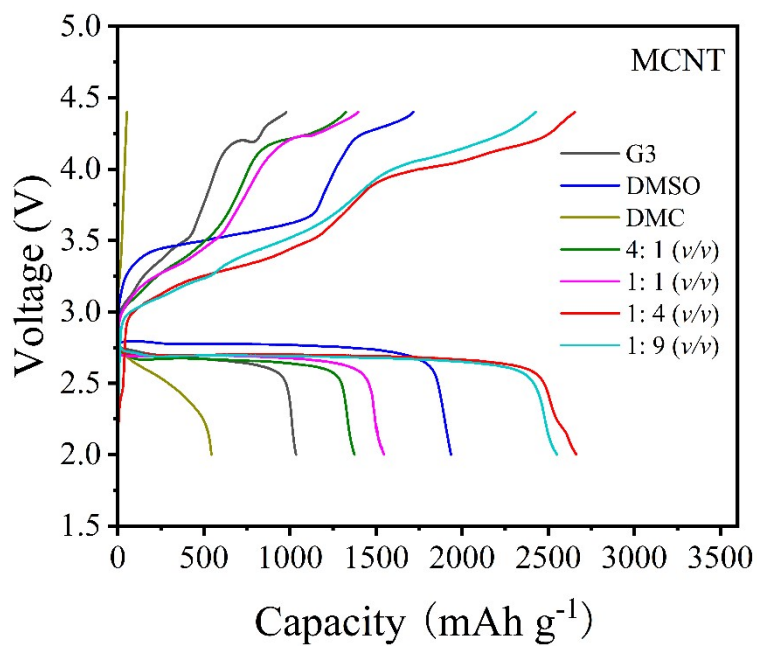

**Fig. S6** The initial 1st full discharge-charge profiles of MCNT cathode using various electrolytes at 0.05 mA cm<sup>-2</sup>.

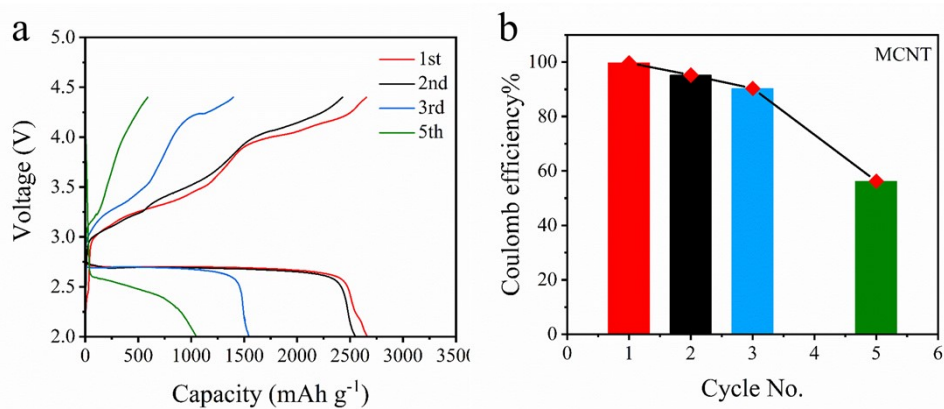

**Fig. S7** (a) The full discharge-charge profiles at 0.05 mA cm<sup>-2</sup> and (b) the corresponding coulomb efficiency of MCNT cathode using G3/DMSO based electrolyte with a volume ratio of 1:4.

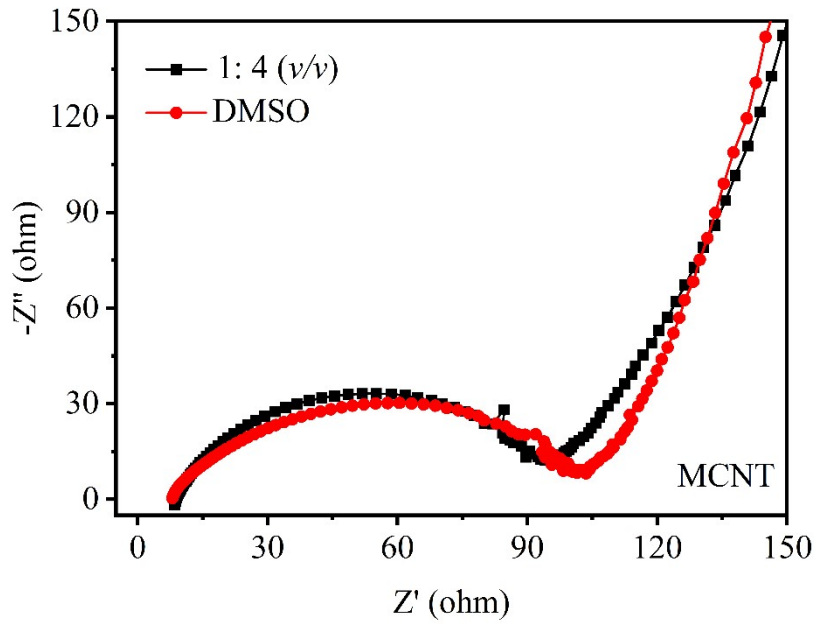

**Fig. S8** The EIS spectra of MCNT LOBs using marked electrolytes.

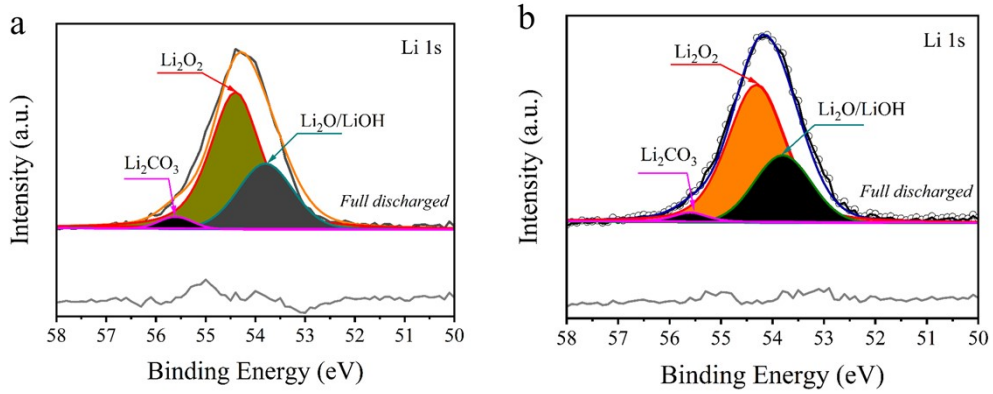

**Fig. S9** The XPS spectra of Li 1s for MCNT cathodes after full discharged process in: (a) DMSO based battery and (b) G3/DMSO based battery

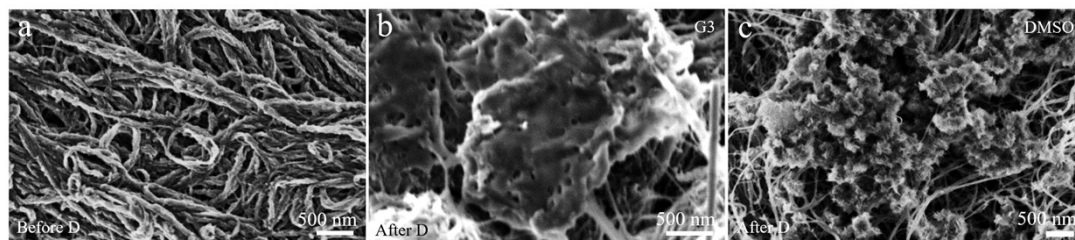

**Fig. S10** SEM images of (a) the pristine MCNT cathode without discharge, 1st discharged products from (b) the G3 and (c) DMSO based battery
